# Supplementary material for: Cancer Cell Membrane-Coated Nanosuspensions for Enhanced Chemotherapeutic Treatment of Glioma
Source: MDPI journal article supplement (doi:10.3390/molecules26165103), 2021-08-23
Supplement: s1 [file s1]

## Supplementary Figures:

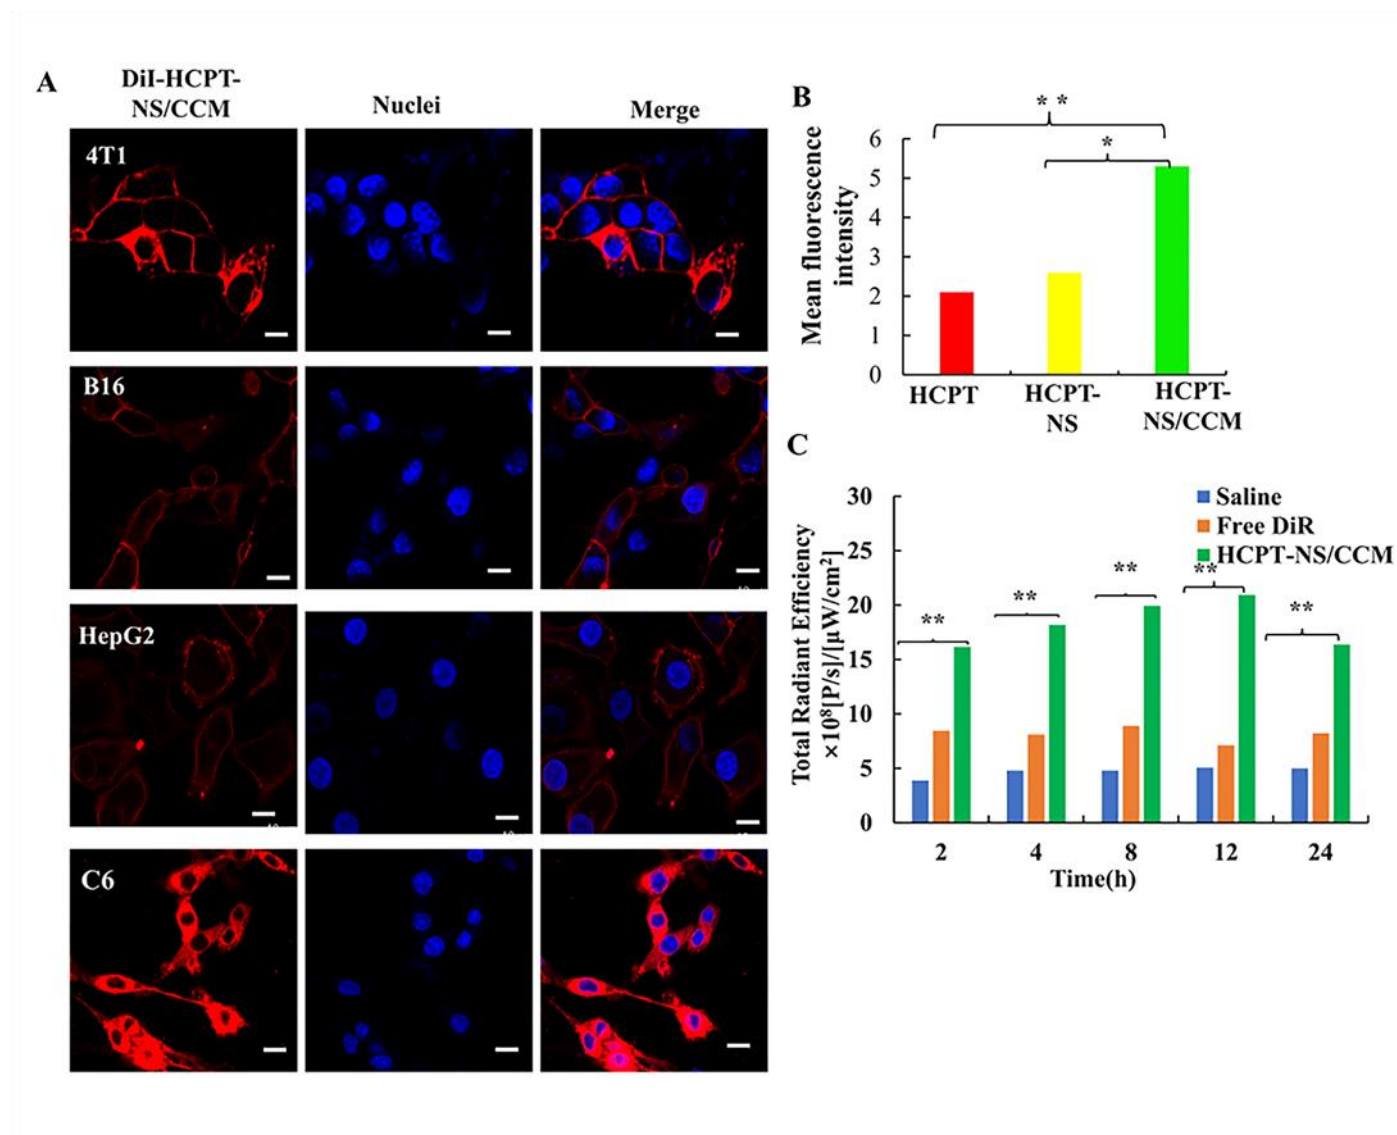

**Figure. S1.** Cellular uptake of HCPT- NS/CCCM in different kinds of cancer cell measured using CLSM assays(A). The TUNEL tumor tissue fluorescence intensity measurement of Image J; 20x magnification(B). Brain fluorescence intensity analysis of saline, DiR-HCPT-NS, and DiR-HCPT-NS/CCM in glioma-bearing mice(C). \* indicates  $p < 0.05$ ; \*\* indicates  $p < 0.01$ .
